# Supplementary material for: SISALv3: A global speleothem stable isotope and trace element database
Source: Copernicus journal article supplement (doi:10.5194/essd-2023-364), 2023-09-13
Supplement: Supplementary file 1 [file essd-2023-364-supplement.pdf]

Table S1: Definition of pre-defined choices for all fields in the SISALv3 database.

| Table name | Field           | Lists                                                                                                                                                                                                                                                                                                                                                                                                                                                                                   |
|------------|-----------------|-----------------------------------------------------------------------------------------------------------------------------------------------------------------------------------------------------------------------------------------------------------------------------------------------------------------------------------------------------------------------------------------------------------------------------------------------------------------------------------------|
| site       | monitoring      | 'yes', 'no', 'unknown'                                                                                                                                                                                                                                                                                                                                                                                                                                                                  |
| entity     | entity_status   | 'current', 'current partially modified', 'superseded'                                                                                                                                                                                                                                                                                                                                                                                                                                   |
| entity     | depth_ref       | 'from top', 'from base', 'not applicable'                                                                                                                                                                                                                                                                                                                                                                                                                                               |
| entity     | geology         | 'limestone', 'dolomite', 'marble', 'dolomite limestone', 'marly limestone', 'calcarenite', 'mixed (see notes)', 'other (see notes)', 'unknown'                                                                                                                                                                                                                                                                                                                                          |
| entity     | rock_age        | 'Holocene', 'Pleistocene', 'Pliocene', 'Miocene', 'Oligocene', 'Eocene', 'Palaeocene', 'Cretaceous', 'Jurassic', 'Triassic', 'Permian', 'Carboniferous', 'Devonian', 'Silurian', 'Ordovician', 'Cambrian', 'Precambrian', 'mixed (see notes)', 'other (see notes)', 'unknown'                                                                                                                                                                                                           |
| entity     | vegetation_type | 'evergreen', 'deciduous', 'shrubland', 'grassland', 'sparse', 'barren', 'trees and grass', 'moorland', 'mixed (see notes)', 'other (see notes)', 'unknown'                                                                                                                                                                                                                                                                                                                              |
| entity     | land_use        | 'water body', 'wetland', 'forest', 'farmland', 'pasture', 'concrete and built up', 'limited or no use', 'mixed (see notes)', 'other (see notes)', 'unknown'                                                                                                                                                                                                                                                                                                                             |
| entity     | copernicus_lcc  | 'unknown', 'shrubs', 'herbaceous vegetation', 'cultivated and managed vegetation / agriculture', 'urban / built up', 'bare / sparse vegetation', 'snow and ice', 'permanent water bodies', 'herbaceous wetland', 'moss and lichen', 'closed forest, evergreen needle leaf', 'closed forest, evergreen broad leaf', 'closed forest, deciduous needle leaf', 'closed forest, deciduous broad leaf', 'closed forest, mixed', 'closed forest, other', 'open forest, evergreen needle leaf', |

|        |                             |                                                                                                                                                                     |
|--------|-----------------------------|---------------------------------------------------------------------------------------------------------------------------------------------------------------------|
|        |                             | 'open forest, evergreen broad leaf', 'open forest, deciduous needle leaf', 'open forest, deciduous broad leaf', 'open forest, mixed', 'open forest, other', 'ocean' |
| entity | cover_type                  | 'thick', 'thin', 'patchy', 'barren', 'mixed (see notes)', 'other (see notes)', 'unknown'                                                                            |
| entity | host_rock_trace_elements    | 'yes', 'no', 'other (see notes)', 'unknown'                                                                                                                         |
| entity | drip_water_trace_elements   | 'yes', 'no', 'other (see notes)', 'unknown'                                                                                                                         |
| entity | speleothem_type             | 'stalagmite', 'composite', 'stalactite', 'flowstone', 'mixed (see notes)', 'other (see notes)', 'unknown'                                                           |
| entity | drip_type                   | 'seepage flow', 'seasonal drip', 'fast flow', 'mixed (see notes)', 'other (see notes)', 'unknown'                                                                   |
| entity | d13C                        | 'yes', 'no', 'unknown'                                                                                                                                              |
| entity | d18O                        | 'yes', 'no', 'unknown'                                                                                                                                              |
| entity | iso_std                     | 'PDB', 'Vienna-PDB', 'unknown'                                                                                                                                      |
| entity | d18O_water_equilibrium      | 'yes', 'no', 'other (see notes)', 'unknown'                                                                                                                         |
| entity | organics                    | 'yes', 'no', 'other (see notes)', 'unknown'                                                                                                                         |
| entity | fluid_inclusions            | 'yes', 'no', 'other (see notes)', 'unknown'                                                                                                                         |
| entity | mineralogy_petrology_fabric | 'yes', 'no', 'other (see notes)', 'unknown'                                                                                                                         |
| entity | clumped_isotopes            | 'yes', 'no', 'other (see notes)', 'unknown'                                                                                                                         |
| entity | noble_gas_temperatures      | 'yes', 'no', 'other (see notes)', 'unknown'                                                                                                                         |
| entity | C14                         | 'yes', 'no', 'other (see notes)', 'unknown'                                                                                                                         |
| entity | ODL                         | 'yes', 'no', 'other (see notes)', 'unknown'                                                                                                                         |
| entity | Sr_Ca                       | 'yes', 'no', 'other (see notes)', 'unknown'                                                                                                                         |
| entity | Sr_Ca_method                | 'solution ICP-MS', 'solution OES-MS', 'solution ICP-AES', 'synchrotron XRF', 'micro XRF', 'micro XRF (ITRAX)', 'LA-ICP-MS', 'LA-ICP-AES', 'SIMS', 'Electron         |

|        |                           |                                                                                                                                                                                                                                                                                                                                                                                                       |
|--------|---------------------------|-------------------------------------------------------------------------------------------------------------------------------------------------------------------------------------------------------------------------------------------------------------------------------------------------------------------------------------------------------------------------------------------------------|
|        |                           | Microprobe (EPMA), 'TIMS', 'other (see notes)', 'unknown'                                                                                                                                                                                                                                                                                                                                             |
| entity | Sr_Ca_std                 | 'NIST SRM 610', 'NIST SRM 612', 'NIST SRM 614', 'CaCO <sub>3</sub> (NIST SRM 915a), SrCO <sub>3</sub> (NIST SRM 987)', 'MACS-1', 'MACS-3', 'standard stock solutions of known concentrations', 'multi-element standards pre-calibrated by Merck etc.', 'Japanese coral standard JCP-1 doped with single element standards of known concentrations', 'metal standards', 'other (see notes)', 'unknown' |
| entity | Sr_Ca_downsampled         | 'No-not applicable', 'No-aliquots of same powder used for stable isotope and trace element measurements', 'No-but different powders used for stable isotope and trace element measurements', 'Yes-author downsampled', 'Yes-SISAL downsampled', 'other (see notes)', 'unknown'                                                                                                                        |
| entity | Sr_Ca_downsampling_method | 'running average/mean', 'linear interpolation', 'NESTool – kernel based downsampling', 'IgorPro – linear smoothing splines', 'IgorPro – interpolation', 'Binned average', 'Savitzky-Golay filter', 'Gaussian kernel', 'Loess', 'Lowess', 'MATLAB – interpolation', 'other (see notes)', 'unknown'                                                                                                     |
| entity | Mg_Ca                     | 'yes', 'no', 'other (see notes)', 'unknown'                                                                                                                                                                                                                                                                                                                                                           |
| entity | Mg_Ca_method              | 'solution ICP-MS', 'solution OES-MS', 'solution ICP-AES', 'synchrotron XRF', 'micro XRF', 'micro XRF (ITRAX)', 'LA-ICP-MS', 'LA-ICP-AES', 'SIMS', 'Electron Microprobe (EPMA)', 'TIMS', 'other (see notes)', 'unknown'                                                                                                                                                                                |
| entity | Mg_Ca_std                 | 'NIST SRM 610', 'NIST SRM 612', 'NIST SRM 614', 'CaCO <sub>3</sub> (NIST SRM 915a), SrCO <sub>3</sub> (NIST SRM 987)', 'MACS-1', 'MACS-3',                                                                                                                                                                                                                                                            |

|        |                           |                                                                                                                                                                                                                                                                                                                                    |
|--------|---------------------------|------------------------------------------------------------------------------------------------------------------------------------------------------------------------------------------------------------------------------------------------------------------------------------------------------------------------------------|
|        |                           | 'standard stock solutions of known concentrations', 'multi-element standards pre-calibrated by Merck etc.', 'Japanese coral standard JCP-1 doped with single element standards of known concentrations', 'metal standards', 'other (see notes)', 'unknown'                                                                         |
| entity | Mg_Ca_downsampled         | 'No-not applicable', 'No-aliquots of same powder used for stable isotope and trace element measurements', 'No-but different powders used for stable isotope and trace element measurements', 'Yes-author downsampled', 'Yes-SISAL downsampled', 'other (see notes)', 'unknown'                                                     |
| entity | Mg_Ca_downsampling_method | 'running average/mean', 'linear interpolation', 'NESTool – kernel based downsampling', 'IgorPro – linear smoothing splines', 'IgorPro – interpolation', 'Binned average', 'Savitzky-Golay filter', 'Gaussian kernel', 'Loess', 'Lowess', 'MATLAB – interpolation', 'other (see notes)', 'unknown'                                  |
| entity | Ba_Ca                     | 'yes', 'no', 'other (see notes)', 'unknown'                                                                                                                                                                                                                                                                                        |
| entity | Ba_Ca_method              | 'solution ICP-MS', 'solution OES-MS', 'solution ICP-AES', 'synchrotron XRF', 'micro XRF', 'micro XRF (ITRAX)', 'LA-ICP-MS', 'LA-ICP-AES', 'SIMS', 'Electron Microprobe (EPMA)', 'TIMS', 'other (see notes)', 'unknown'                                                                                                             |
| entity | Ba_Ca_std                 | 'NIST SRM 610', 'NIST SRM 612', 'NIST SRM 614', 'CaCO <sub>3</sub> (NIST SRM 915a), SrCO <sub>3</sub> (NIST SRM 987)', 'MACS-1', 'MACS-3', 'standard stock solutions of known concentrations', 'multi-element standards pre-calibrated by Merck etc.', 'Japanese coral standard JCP-1 doped with single element standards of known |

|        |                           |                                                                                                                                                                                                                                                                                                                                                                                                       |
|--------|---------------------------|-------------------------------------------------------------------------------------------------------------------------------------------------------------------------------------------------------------------------------------------------------------------------------------------------------------------------------------------------------------------------------------------------------|
|        |                           | concentrations', 'metal standards', 'other (see notes)', 'unknown'                                                                                                                                                                                                                                                                                                                                    |
| entity | Ba_Ca_downsampled         | 'No-not applicable', 'No-aliquots of same powder used for stable isotope and trace element measurements', 'No-but different powders used for stable isotope and trace element measurements', 'Yes-author downsampled', 'Yes-SISAL downsampled', 'other (see notes)', 'unknown'                                                                                                                        |
| entity | Ba_Ca_downsampling_method | 'running average/mean', 'linear interpolation', 'NESTool – kernel based downsampling', 'IgorPro – linear smoothing splines', 'IgorPro – interpolation', 'Binned average', 'Savitzky-Golay filter', 'Gaussian kernel', 'Loess', 'Lowess', 'MATLAB – interpolation', 'other (see notes)', 'unknown'                                                                                                     |
| entity | U_Ca                      | 'yes', 'no', 'other (see notes)', 'unknown'                                                                                                                                                                                                                                                                                                                                                           |
| entity | U_Ca_method               | 'solution ICP-MS', 'solution OES-MS', 'solution ICP-AES', 'synchrotron XRF', 'micro XRF', 'micro XRF (ITRAX)', 'LA-ICP-MS', 'LA-ICP-AES', 'SIMS', 'Electron Microprobe (EPMA)', 'TIMS', 'other (see notes)', 'unknown'                                                                                                                                                                                |
| entity | U_Ca_std                  | 'NIST SRM 610', 'NIST SRM 612', 'NIST SRM 614', 'CaCO <sub>3</sub> (NIST SRM 915a), SrCO <sub>3</sub> (NIST SRM 987)', 'MACS-1', 'MACS-3', 'standard stock solutions of known concentrations', 'multi-element standards pre-calibrated by Merck etc.', 'Japanese coral standard JCP-1 doped with single element standards of known concentrations', 'metal standards', 'other (see notes)', 'unknown' |
| entity | U_Ca_downsampled          | 'No-not applicable', 'No-aliquots of same powder used for stable isotope and trace element                                                                                                                                                                                                                                                                                                            |

|        |                          |                                                                                                                                                                                                                                                                                                                                                                                                       |
|--------|--------------------------|-------------------------------------------------------------------------------------------------------------------------------------------------------------------------------------------------------------------------------------------------------------------------------------------------------------------------------------------------------------------------------------------------------|
|        |                          | measurements', 'No-but different powders used for stable isotope and trace element measurements', 'Yes-author downsampled', 'Yes-SISAL downsampled', 'other (see notes)', 'unknown'                                                                                                                                                                                                                   |
| entity | U_Ca_downsampling_method | 'running average/mean', 'linear interpolation', 'NESTool – kernel based downsampling', 'IgorPro – linear smoothing splines', 'IgorPro – interpolation', 'Binned average', 'Savitzky-Golay filter', 'Gaussian kernel', 'Loess', 'Lowess', 'MATLAB – interpolation', 'other (see notes)', 'unknown'                                                                                                     |
| entity | P_Ca                     | 'yes', 'no', 'other (see notes)', 'unknown'                                                                                                                                                                                                                                                                                                                                                           |
| entity | P_Ca_method              | 'solution ICP-MS', 'solution OES-MS', 'solution ICP-AES', 'synchrotron XRF', 'micro XRF', 'micro XRF (ITRAX)', 'LA-ICP-MS', 'LA-ICP-AES', 'SIMS', 'Electron Microprobe (EPMA)', 'TIMS', 'other (see notes)', 'unknown'                                                                                                                                                                                |
| entity | P_Ca_std                 | 'NIST SRM 610', 'NIST SRM 612', 'NIST SRM 614', 'CaCO <sub>3</sub> (NIST SRM 915a), SrCO <sub>3</sub> (NIST SRM 987)', 'MACS-1', 'MACS-3', 'standard stock solutions of known concentrations', 'multi-element standards pre-calibrated by Merck etc.', 'Japanese coral standard JCP-1 doped with single element standards of known concentrations', 'metal standards', 'other (see notes)', 'unknown' |
| entity | P_Ca_downsampled         | 'No-not applicable', 'No-aliquots of same powder used for stable isotope and trace element measurements', 'No-but different powders used for stable isotope and trace element measurements', 'Yes-author downsampled', 'Yes-SISAL                                                                                                                                                                     |

|                     |                             |                                                                                                                                                                                                                                                                                                                                                                                                       |
|---------------------|-----------------------------|-------------------------------------------------------------------------------------------------------------------------------------------------------------------------------------------------------------------------------------------------------------------------------------------------------------------------------------------------------------------------------------------------------|
|                     |                             | downsampled', 'other (see notes)', 'unknown'                                                                                                                                                                                                                                                                                                                                                          |
| entity              | P_Ca_downsampling_method    | 'running average/mean', 'linear interpolation', 'NESTool – kernel based downsampling', 'IgorPro – linear smoothing splines', 'IgorPro – interpolation', 'Binned average', 'Savitzky-Golay filter', 'Gaussian kernel', 'Loess', 'Lowess', 'MATLAB – interpolation', 'other (see notes)', 'unknown'                                                                                                     |
| entity              | Sr_isotopes                 | 'yes', 'no', 'other (see notes)', 'unknown'                                                                                                                                                                                                                                                                                                                                                           |
| entity              | Sr_isotopes_method          | 'solution ICP-MS', 'solution OES-MS', 'solution ICP-AES', 'synchrotron XRF', 'micro XRF', 'micro XRF (ITRAX)', 'LA-ICP-MS', 'LA-ICP-AES', 'SIMS', 'Electron Microprobe (EPMA)', 'TIMS', 'other (see notes)', 'unknown'                                                                                                                                                                                |
| entity              | Sr_isotopes_std             | 'NIST SRM 610', 'NIST SRM 612', 'NIST SRM 614', 'CaCO <sub>3</sub> (NIST SRM 915a), SrCO <sub>3</sub> (NIST SRM 987)', 'MACS-1', 'MACS-3', 'standard stock solutions of known concentrations', 'multi-element standards pre-calibrated by Merck etc.', 'Japanese coral standard JCP-1 doped with single element standards of known concentrations', 'metal standards', 'other (see notes)', 'unknown' |
| entity              | trace_elements_datafile     | 'yes', 'no'                                                                                                                                                                                                                                                                                                                                                                                           |
| entity              | trace_elements_metadatafile | 'yes', 'no'                                                                                                                                                                                                                                                                                                                                                                                           |
| entity              | cave_map                    | 'yes', 'no'                                                                                                                                                                                                                                                                                                                                                                                           |
| entity              | entity_scan                 | 'yes', 'no'                                                                                                                                                                                                                                                                                                                                                                                           |
| gap                 | gap                         | 'G'                                                                                                                                                                                                                                                                                                                                                                                                   |
| hiatus              | hiatus                      | 'H'                                                                                                                                                                                                                                                                                                                                                                                                   |
| original_chronology | age_model_type              | 'linear', 'linear between dates', 'polynomial fit', 'polynomial fit omitting outliers', 'Bayesian', 'Bayesian Bacon', 'Bayesian Bchron', 'StalAge', 'StalAge and other', 'Clam', 'COPRA', 'OxCal', 'mixed (see notes)', 'other (see notes)', 'unknown'                                                                                                                                                |

|                     |                |                                                                                                                           |
|---------------------|----------------|---------------------------------------------------------------------------------------------------------------------------|
| original_chronology | ann_lam_check  | '14C peak', '14C slope', 'U/Th cycle', 'trace element cycle', 'assumed', 'not applicable', 'other (see notes)', 'unknown' |
| original_chronology | dep_rate_check | 'yes', 'no', 'assumed', 'not applicable', 'unknown'                                                                       |
| sample              | mineralogy     | 'calcite', 'secondary calcite', 'aragonite', 'vaterite', 'organic', 'mixed (see notes)', 'other (see notes)', 'unknown'   |
| sample              | arag_corr      | 'yes', 'no', 'not applicable', 'unknown'                                                                                  |
